# Supplementary material for: Investigation on the role of Lewis bases in the ripening process of perovskite films for highly efficient perovskite solar cells
Source: Royal Society of Chemistry journal article supplement (doi:10.1039/c7ta05378a), 2017-01-01
Supplement: c7ta05378a1.pdf [file c7ta05378a1.pdf]

## Electronic Supplementary Information

### Investigation on the role of Lewis bases in ripening process of perovskite films for highly efficient perovskite solar cells

Lifeng Zhu,<sup>a,b</sup> Yuzuan Xu,<sup>a,b</sup> Pengpeng Zhang,<sup>a,b</sup> Jiangjian Shi,<sup>a,b</sup> Yanhong Zhao,<sup>a,b</sup> Huiyin Zhang,<sup>a,b</sup> Jionghua Wu,<sup>a,b</sup> Yanhong Luo,<sup>a,b</sup> Dongmei Li<sup>a,b\*</sup> and Qingbo Meng<sup>a,b\*</sup>

<sup>a</sup> Key Laboratory for Renewable Energy, Chinese Academy of Sciences (CAS), Beijing Key Laboratory for New Energy Materials and Devices, Beijing National Laboratory for Condensed Matter Physics, Institute of Physics, CAS, Beijing 100190, China.

<sup>b</sup> School of Physical Sciences, University of Chinese Academy of Sciences, Beijing 100049, China.

\*Emails: qbmeng@iphy.ac.cn (Q. Meng); dmli@iphy.ac.cn (D. Li)

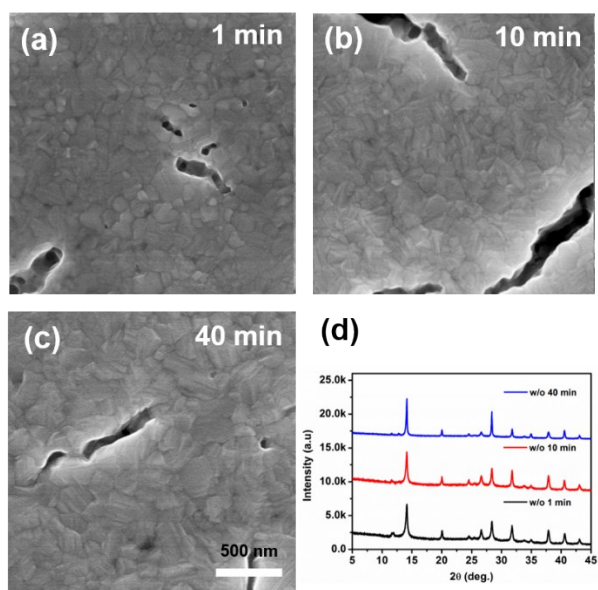

**Fig. S1** SEM images of perovskite films derived from the precursor without Lewis base annealed for (a) 1 min, (b) 10 min and (c) 40 min. (d) XRD patterns of as-prepared perovskite films.

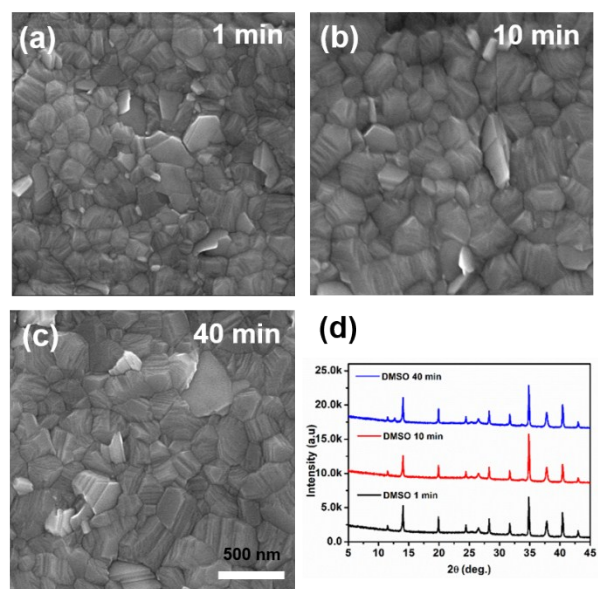

**Fig. S2** SEM images of perovskite films obtained from the DMSO-based precursor annealed for (a) 1 min, (b) 10 min and (c) 40 min and their corresponding XRD patterns (d).

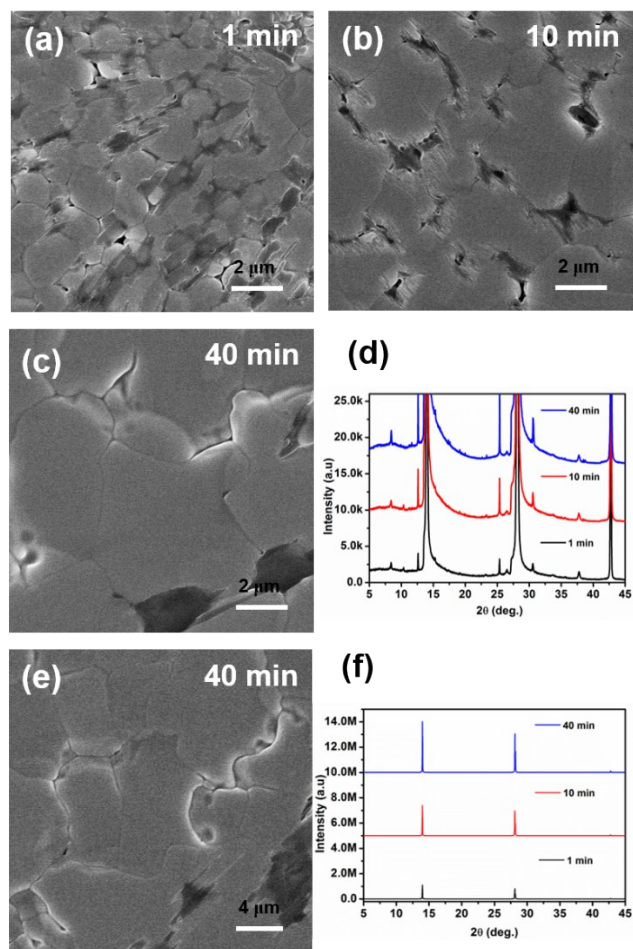

**Fig. S3** SEM images of perovskite films obtained from thiourea-based precursor annealed for (a) 1 min, (b) 10 min, (c) and (e) 40 min (in different scale bar); (d) and (f) corresponding XRD patterns.

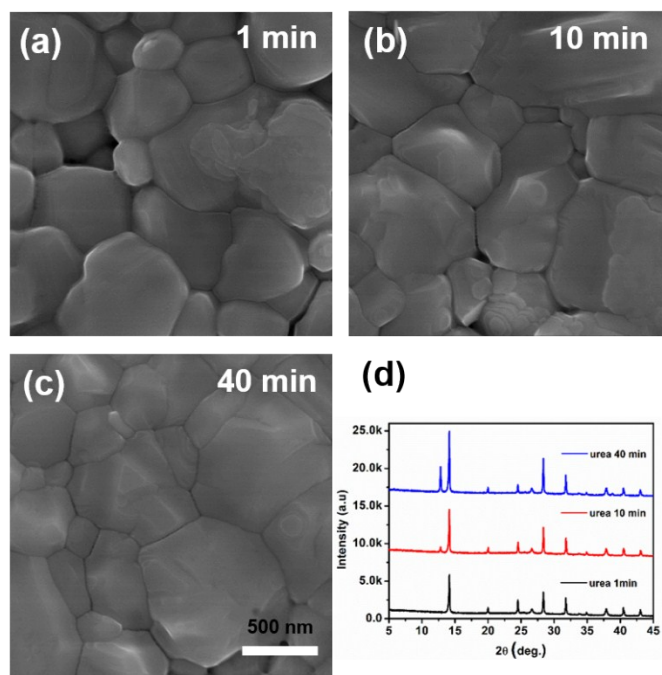

**Fig. S4** SEM images of perovskite film obtained from precursor with urea annealed for (a) 1 min, (b) 10 min and (c) 40 min. (d) XRD spectra of perovskite film of (a), (b) and (c).

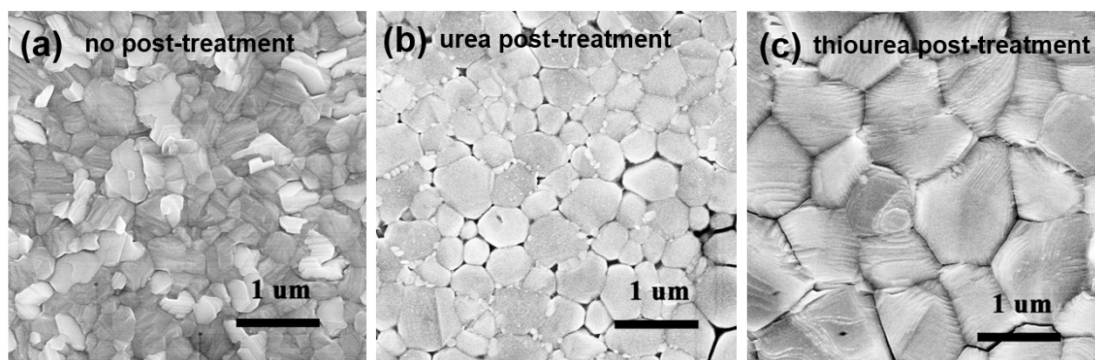

**Fig. S5** SEM images of perovskite films from the DMSO-based precursor, (a) annealed for 40 min without any treatment; (b)-(c) with post-treatment (first annealed for 10 min, then spin-coated with a urea or thiourea isopropanolic solution and finally annealed for another 30 min).

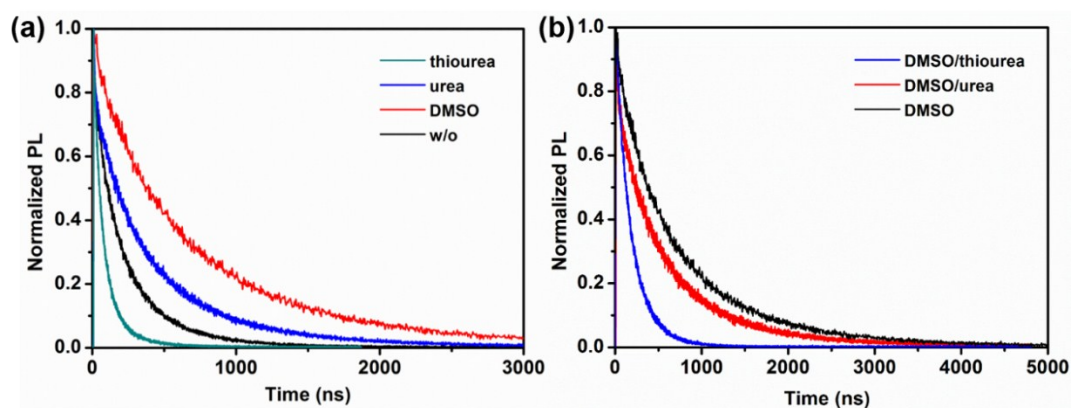

**Fig. S6** Time-resolved transient PL decay curves of perovskite films deposited on  $\text{TiO}_2$  substrates which are derived from different precursors (a) individually with DMSO, urea and thiourea or without Lewis base; (b) with mixed Lewis bases.

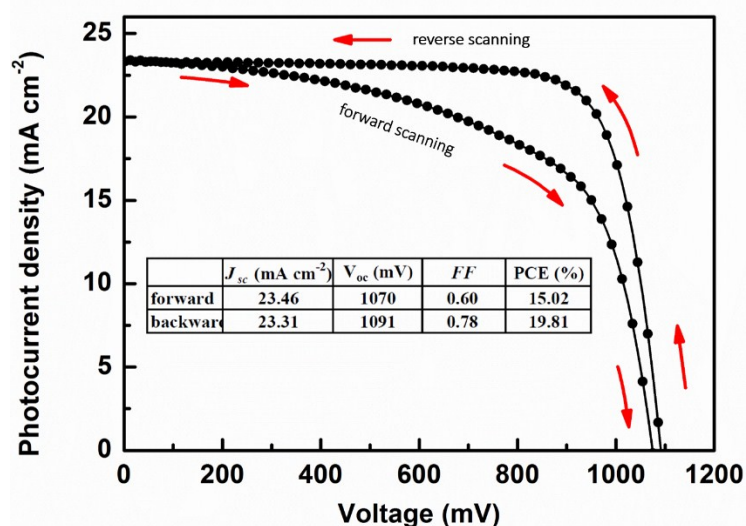

**Fig. S7** I-V curves of the perovskite solar cell derived from the DMSO/urea-based precursor in different scan directions with  $30 \text{ mV} \cdot \text{s}^{-1}$  scanning speed.
